# Supplementary material for: Clinical relevance of the transcriptional signature regulated by CDC42 in colorectal cancer
Source: PubMed Central journal article supplement (PMC5432295; doi:10.18632/oncotarget.15815), 2017-03-01
Supplement: oncotarget-08-26755-s001.pdf [file oncotarget-08-26755-s001.pdf]

# Clinical relevance of the transcriptional signature regulated by CDC42 in colorectal cancer

## Supplementary Materials

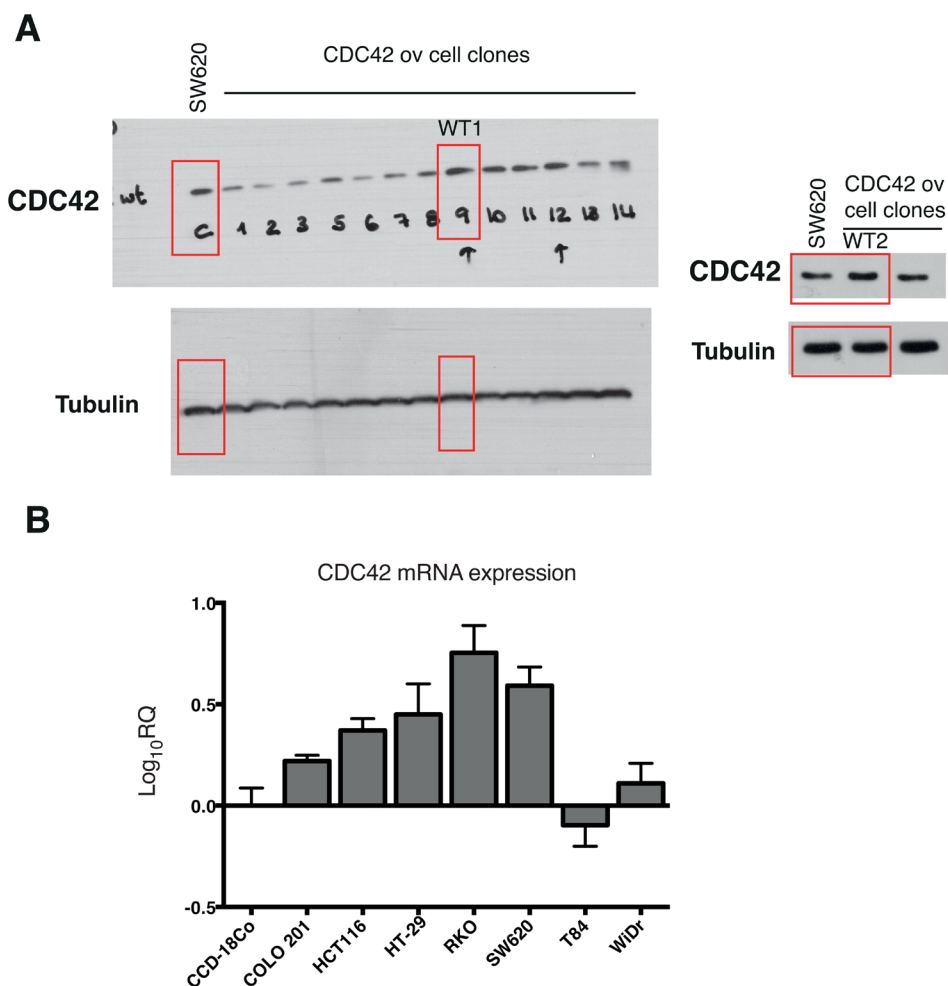

**Supplementary Figure 1:** (A) Original Western Blot images for CDC42 and Tubulin of the CDC42 overexpressing clones (CDC42 ov) used in this study. The red rectangle indicates the images taken to build Figure 1A. (B) *CDC42* mRNA expression was analyzed by qPCR in seven CRC cell lines and compared to the primary colon fibroblast cell line CCD-18Co, the data was normalized with 18S and relative to CCD-18Co (Log<sub>10</sub>RQ).

| Top Diseases and Bio Functions                |                                                                                                               |             |
|-----------------------------------------------|---------------------------------------------------------------------------------------------------------------|-------------|
| Diseases and Disorders                        |                                                                                                               |             |
| Name                                          | p-value range                                                                                                 | # Molecules |
| Cancer                                        | 1.35E-02 - 1.74E-04                                                                                           | 125         |
| Organismal Injury and Abnormalities           | 1.35E-02 - 1.74E-04                                                                                           | 130         |
| Developmental Disorder                        | 1.35E-02 - 1.75E-04                                                                                           | 48          |
| Neurological Disease                          | 1.35E-02 - 1.75E-04                                                                                           | 34          |
| Cardiovascular Disease                        | 1.35E-02 - 2.71E-04                                                                                           | 22          |
| Molecular and Cellular Functions              |                                                                                                               |             |
| Name                                          | p-value range                                                                                                 | # Molecules |
| Cell Cycle                                    | 1.35E-02 - 4.56E-05                                                                                           | 22          |
| Cell Death and Survival                       | 1.35E-02 - 4.56E-05                                                                                           | 56          |
| Lipid Metabolism                              | 1.35E-02 - 8.24E-05                                                                                           | 23          |
| Molecular Transport                           | 1.35E-02 - 8.24E-05                                                                                           | 36          |
| Small Molecule Biochemistry                   | 1.35E-02 - 8.24E-05                                                                                           | 35          |
| Physiological System Development and Function |                                                                                                               |             |
| Name                                          | p-value range                                                                                                 | # Molecules |
| Endocrine System Development and Function     | 1.35E-02 - 2.01E-05                                                                                           | 7           |
| Organ Morphology                              | 1.35E-02 - 2.01E-05                                                                                           | 22          |
| Embryonic Development                         | 1.35E-02 - 4.56E-05                                                                                           | 30          |
| Tissue Development                            | 1.35E-02 - 2.20E-04                                                                                           | 34          |
| Digestive System Development and Function     | 1.35E-02 - 5.29E-04                                                                                           | 19          |
| Top Networks                                  |                                                                                                               |             |
| ID                                            | Associated Network Functions                                                                                  | Score       |
| 1                                             | Cell-To-Cell Signaling and Interaction, Cardiovascular System Development and Function, Embryonic Development | 48          |
| 2                                             | Digestive System Development and Function, Organismal Injury and Abnormalities, Renal and Urological Disease  | 38          |
| 3                                             | Cell Death and Survival, Embryonic Development, Cancer                                                        | 35          |
| 4                                             | Cell-To-Cell Signaling and Interaction, Developmental Disorder, Hereditary Disorder                           | 26          |
| 5                                             | Amino Acid Metabolism, Small Molecule Biochemistry, Cellular Growth and Proliferation                         | 26          |

**Supplementary Figure 2: Ingenuity pathways analysis (IPA) summary of the top diseases and bio functions and networks transcriptionally regulated by CDC42.** A total number of 190 genes were identified from the array analyses, 89 were up-regulated and 101 down-regulated by CDC42. Cancer and cancer-related functions are significantly overrepresented in the IPA analysis.

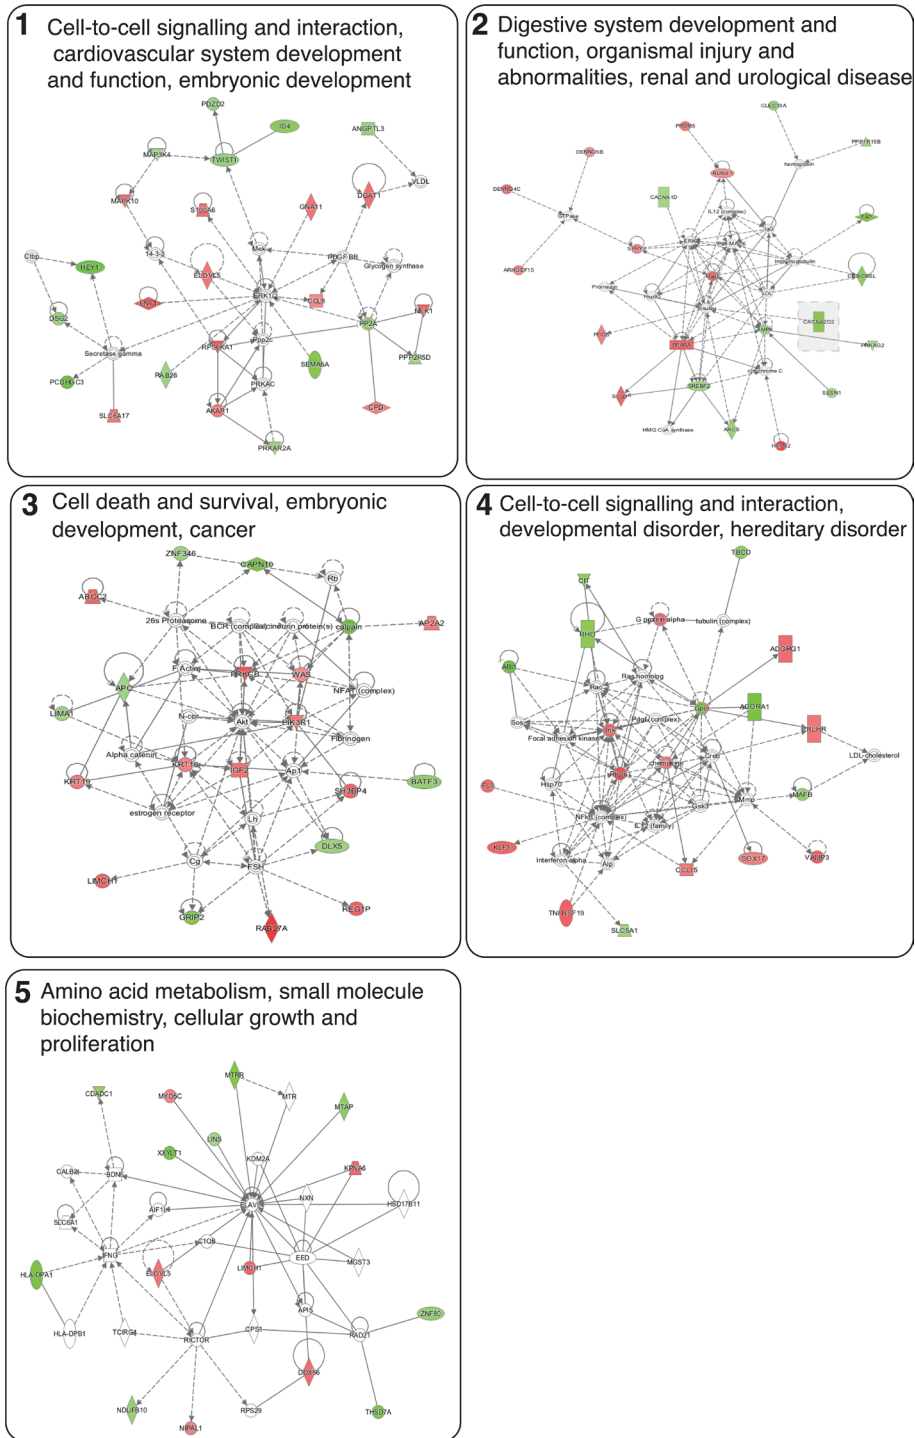

**Supplementary Figure 3: Gene networks modulated by CDC42 in colorectal cancer.** IPA was used to identify relevant gene networks. The top 5 relevant gene networks, including most of the differentially expressed genes, are shown. Red nodes represent up-regulated genes and green nodes represent down-regulated genes identified by microarray analysis. White nodes represent genes not regulated by CDC42 but related to these signalling pathways. Solid lines imply direct relationships between proteins; dotted lines imply indirect interactions. Relationships are primarily due to co-expression, but can also include phosphorylation/dephosphorylation, proteolysis, activation/deactivation, transcription, binding, inhibition, biochemical modification.

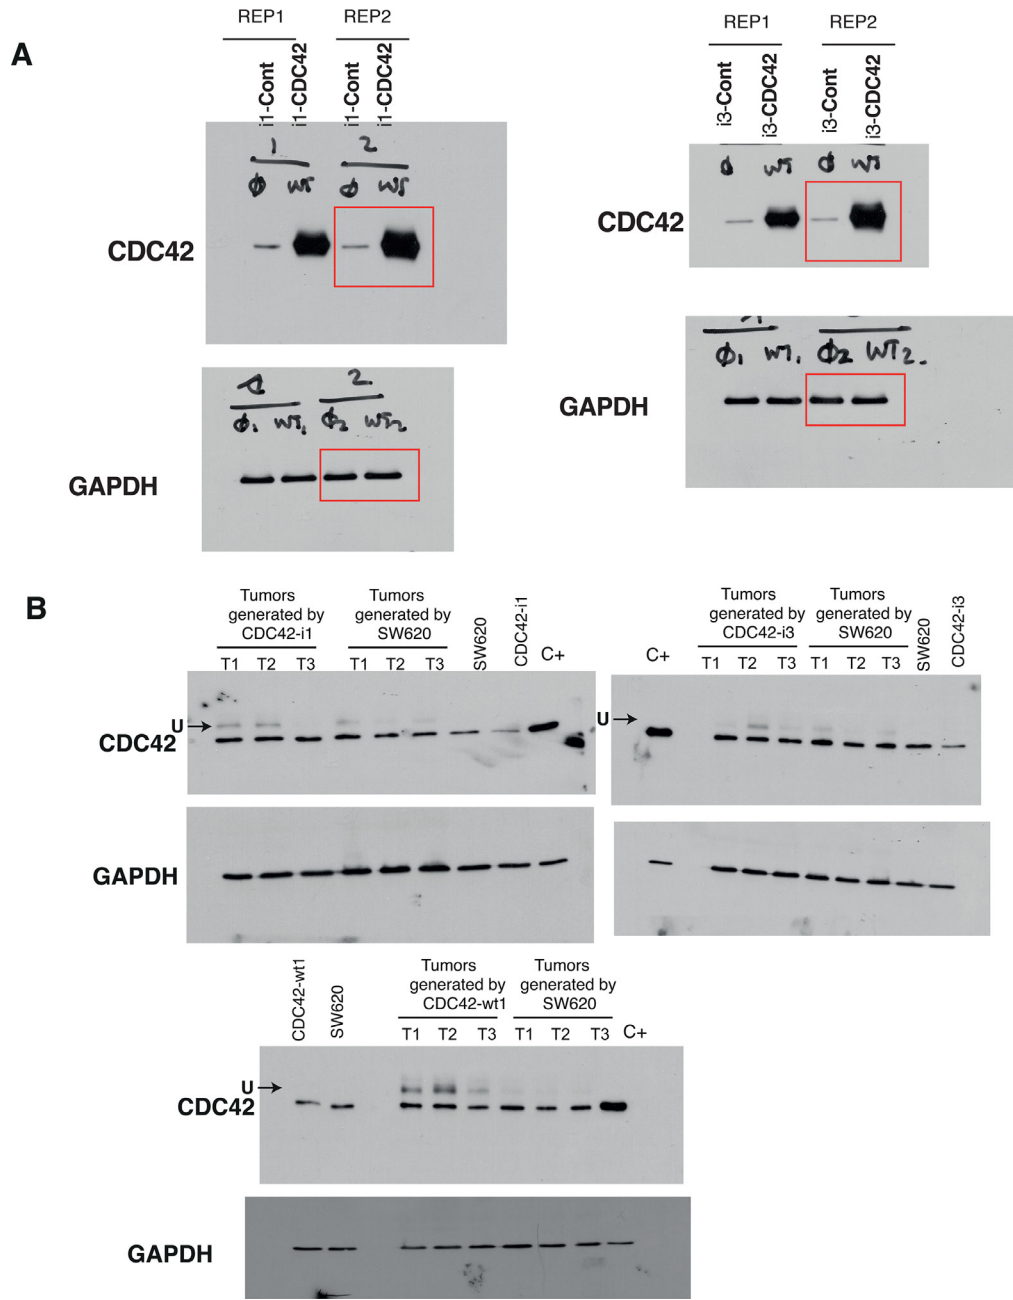

**Supplementary Figure 4:** (A) Original Western Blot images for CDC42 and GAPDH of the transient transfection of CDC42 in the SW620-CDC42-i1 and SW620-CDC42-i3 cells. The red rectangle indicates the images taken to build Figure 4B. (B) Original Western Blot images for CDC42 and GAPDH of the xenograft tumors generated from the different CDC42-clones. A positive control of HEK293T cells overexpressing CDC42 was used (C+). An unspecific upper band (U) appeared in some of the tumors analysed.

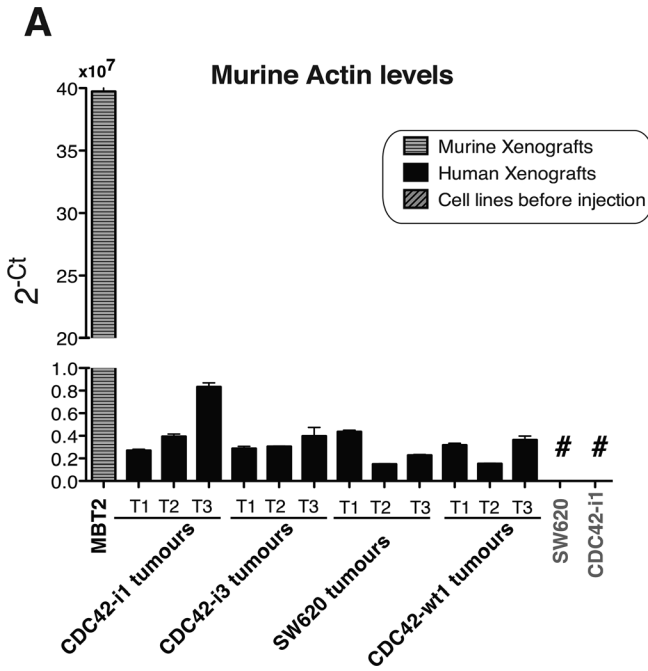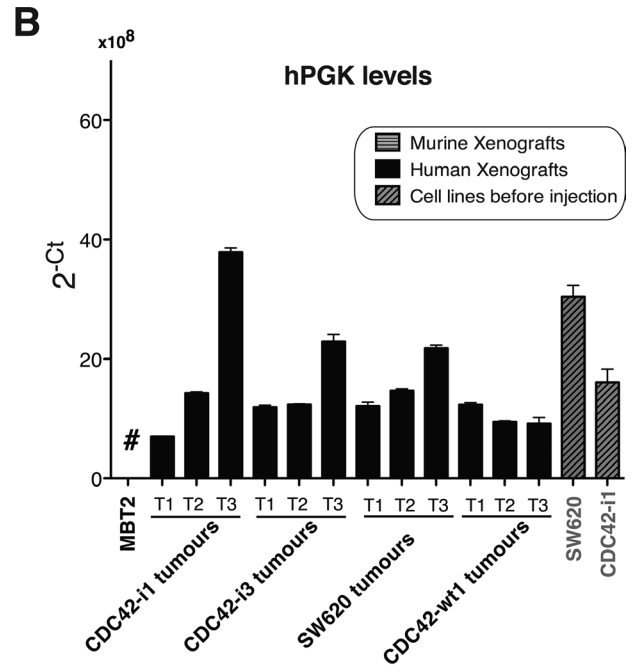

**Supplementary Figure 5: Estimation of mouse contamination in the xenograft samples.** For xenograft specimens, the percentage of mouse and human component was determined by qPCR measurement using species-specific probes,  $\beta$ -actin for mouse component (left panel) and *PGK1* for human component (right panel). MBT2 mouse cell line xenograft was used as positive control for mouse specificity and SW620 and CDC42-i1 cell lines were used as positive control of human specificity.

**Supplementary Table 1: Tumor incidence of the CDC42-SW620 xenografts**

| <b>GROUP</b> | <b>FLANKS INOCULATED</b> | <b>POSITIVE FLANKS</b> | <b>TUMOR INCIDENCE (%)</b> |
|--------------|--------------------------|------------------------|----------------------------|
| CDC42-i1     | 16                       | 4                      | 25                         |
| CDC42-i3     | 16                       | 16                     | 100                        |
| SW620-cont   | 16                       | 15                     | 94                         |
| CDC42-wt1    | 16                       | 13                     | 81                         |

**Supplementary Table 2: List of differentially expressed genes ( $p$ -value  $\leq 0.05$ ) by CDC42 in SW620 cells. See Supplementary\_Table\_2**

**Supplementary Table 3: Full table of gene set enrichment analyses for curated gene sets/canonical pathways ( $p$ -value  $\leq 0.05$ ) for CDC42 regulated genes in SW620 cells. See Supplementary\_Table\_3**

**Supplementary Table 4: 57 genes correlated with CDC42 transcriptional signature in TCGA CRC patients (red: up-regulated genes, blue: down-regulated genes). See Supplementary\_Table\_4**

**Supplementary Table 5: Full table of gene set enrichment analyses for curated gene sets/ canonical pathways ( $p$ -value  $\leq 0.05$ ) for CDC42 regulated genes in TCGA datasets. See Supplementary\_Table\_5**
